# Supplementary material
Source: publisher figshare collection journal article supplement (https://karger.figshare.com/ndownloader/files/27538562)
Supplement: Supplementary file 1 [file 27538562]

**Supplementary data**

**Fig. 1.** HPLC purification of GHK peptide.

**Fig. 2.** HPLC purification of acetyl tetrapeptide-5.

**Fig. 3.** HPLC purification of hexapeptide-11.

**Fig. 4.** HPLC purification of acetyl hexapeptide-3.
